# Supplementary material
Source: PubMed Central journal article supplement (PMC8342608)
Supplement: ONCO-26-685-s001.pdf [file ONCO-26-685-s001.pdf]

Supplemental Tables for:  
Impact of cancer history on outcomes among hospitalized COVID-19 patients  
Isaac Klein et al.

**Table S1. Cancer types**

| <b>Cancer</b>                  | <b>N=162</b> |
|--------------------------------|--------------|
| <b>Solid tumor (n=129)</b>     | <b>n (%)</b> |
| Adrenal                        | 1 (0.6)      |
| Bile duct                      | 1 (0.6)      |
| Bladder/urothelial             | 15 (9.3)     |
| Brain                          | 5 (3.1)      |
| Breast                         | 14 (8.6)     |
| Colorectal/Anal                | 14 (8.6)     |
| Endometrial                    | 5 (3.1)      |
| Esophageal                     | 2 (1.2)      |
| Gastric                        | 3 (1.9)      |
| Liver                          | 3 (1.9)      |
| Lung                           | 14 (8.6)     |
| Melanoma                       | 4 (2.5)      |
| Non-melanoma skin cancer       | 4 (2.5)      |
| Oropharyngeal                  | 4 (2.5)      |
| Ovarian                        | 2 (1.2)      |
| Pancreatic                     | 2 (1.2)      |
| Renal                          | 6 (3.7)      |
| Testicular                     | 2 (1.2)      |
| Thyroid                        | 4 (2.5)      |
| Prostate                       | 22 (13.6)    |
| Sarcoma                        | 1 (0.6)      |
| Unknown primary                | 1 (0.6)      |
| <b>Hematologic (n=33)</b>      |              |
| Leukemia                       | 15 (9.3)     |
| Multiple myeloma/myelofibrosis | 5 (3.1)      |
| Lymphoma                       | 13 (8.0)     |

Supplemental Tables for:  
Impact of cancer history on outcomes among hospitalized COVID-19 patients  
Isaac Klein et al.

**Table S2. Median (range) presenting vitals and lab values**

| Vitals and lab values         | Total                  | Current or prior cancer history | No history of cancer   | p-value* |
|-------------------------------|------------------------|---------------------------------|------------------------|----------|
| Heart rate                    | 82 (39-139)            | 83 (50-130)                     | 81 (39-139)            | 0.35     |
| Systolic BP <sup>a</sup>      | 124 (73-217)           | 124 (73-196)                    | 124 (77-217)           | 0.43     |
| Diastolic BP <sup>a</sup>     | 66 (42-118)            | 67 (48-106)                     | 65 (42-118)            | 0.39     |
| Respiratory rate <sup>b</sup> | 20 (8-98)              | 20.0 (12-98)                    | 20.0 (8-55)            | 0.14     |
| Temperature                   | 98.6 (94.5-103.6)      | 98.9 (96.4-103.3)               | 98.6 (94.5-103.6)      | 0.007    |
| O <sub>2</sub>                | 96 (38-100)            | 96 (64-100)                     | 96 (38-100)            | 0.84     |
| WBC <sup>c</sup>              | 6.51 (0.17-141.85)     | 5.70 (0.17-141.85)              | 6.71 (1.44-39.45)      | 0.04     |
| ALC <sup>c</sup>              | 0.79 (0.05-125.54)     | 0.73 (0.05-125.54)              | 0.83 (0.05-123.0)      | 0.004    |
| ANC <sup>c</sup>              | 4.97 (0.01-37.08)      | 4.47 (0.01-22.0)                | 5.12 (0.20-37.08)      | 0.09     |
| Cr <sup>c</sup>               | 1.07 (0.41-11.04)      | 1.05 (0.41-10.94)               | 1.07 (0.41-11.04)      | 0.15     |
| ALT <sup>d</sup>              | 26.0 (3.15-6762.00)    | 24.5 (5.0-238.0)                | 26 (3.15-6762.00)      | 0.32     |
| AST <sup>e</sup>              | 38.0 (1.99-14372.00)   | 38 (7.00-383.00)                | 38.0 (1.99-14372.00)   | 0.38     |
| Bilirubin <sup>f</sup>        | 0.5 (0.1-10.0)         | 0.5 (0.1-3.2)                   | 0.5 (0.1-10.0)         | 0.87     |
| Ferritin <sup>g</sup>         | 539.5 (18.0-56406.00)  | 572.50 (18.0-10563.00)          | 520.50 (18-56406.00)   | 0.89     |
| LDH <sup>h</sup>              | 319.0 (3.75-14810.00)  | 307.0 (3.75-6480.0)             | 327.5 (109.0-14810.0)  | 0.04     |
| CRP <sup>i</sup>              | 78.3 (0.40-674.50)     | 82.1 (1.0-674.5)                | 75.8 (0.4-305.0)       | 0.28     |
| ESR <sup>j</sup>              | 44.0 (2.0-140.0)       | 48 (3-134)                      | 42 (2-140)             | 0.06     |
| D-dimer <sup>g</sup>          | 1263.0 (0.66-85827.00) | 1284.0 (0.66-10000.00)          | 1246.0 (175.0-85827.0) | 0.98     |
| IL6 <sup>k</sup>              | 39.5 (1.0-1340.9)      | 41.1 (2.2-400.0)                | 36.2 (1.0-1340.9)      | 0.95     |
| Procalcitonin <sup>l</sup>    | 0.17 (0.02-100.00)     | 0.17 (0.02-13.49)               | 0.17 (0.03-100.00)     | 0.54     |

\*Wilcoxon rank-sum test

<sup>a</sup>n=2 missing

<sup>b</sup>n=9 missing

<sup>c</sup>n=1 missing

<sup>d</sup>n=8 missing

<sup>e</sup>n=7 missing

<sup>f</sup>n=5 missing

<sup>g</sup>n=30 missing

<sup>h</sup>n=31 missing

<sup>i</sup>n=26 missing

<sup>j</sup>n=126 missing

<sup>k</sup>n=343 missing

<sup>l</sup>n=41 missing

ALC, absolute lymphocyte count; ALT, alanine aminotransferase; ANC, absolute neutrophil count; AST, aspartate aminotransferase; BP, blood pressure; Cr, creatinine; CRP, C-reactive protein; ESR, erythrocyte sedimentation rate; IL6, interleukin-6; LDH, lactic acid dehydrogenase; O<sub>2</sub>, oxygen; WBC, white blood cell
